# Supplementary material for: RUFY3 promotes the progression of hepatocellular carcinoma through activating NF-κB-mediated epithelial-mesenchymal transition
Source: publisher site journal article supplement (doi:10.18632/aging.203444), 2021-09-12
Supplement: Supplementary file [file aging-v13i17-203444-supplementary-material-SD1.pdf]

## SUPPLEMENTARY TABLE

Supplementary Table 1. Primers designed for qRT-PCR.

| Genes        | Sequence (5'-3')     |                     |
|--------------|----------------------|---------------------|
|              | Forward              | Reverse             |
| <b>RUFY3</b> | TTGTGGTGATGGAGCACTGT | GCCAGGCTCTCCTCTACCT |
| <b>GAPDH</b> | AGGGGCCATCCACAGTCTTC | AGAAGGCTGGGGCTCATTG |
